# Supplementary figures and images for: Clostridium perfringens Epsilon Toxin Causes Selective Death of Mature Oligodendrocytes and Central Nervous System Demyelination
Source: PubMed Central journal article supplement — mBio. 2015 Jun 16;6(3):e02513-14. doi: 10.1128/mBio.02513-14 (PMC4471556; doi:10.1128/mbio.02513-14), 2015-06-16

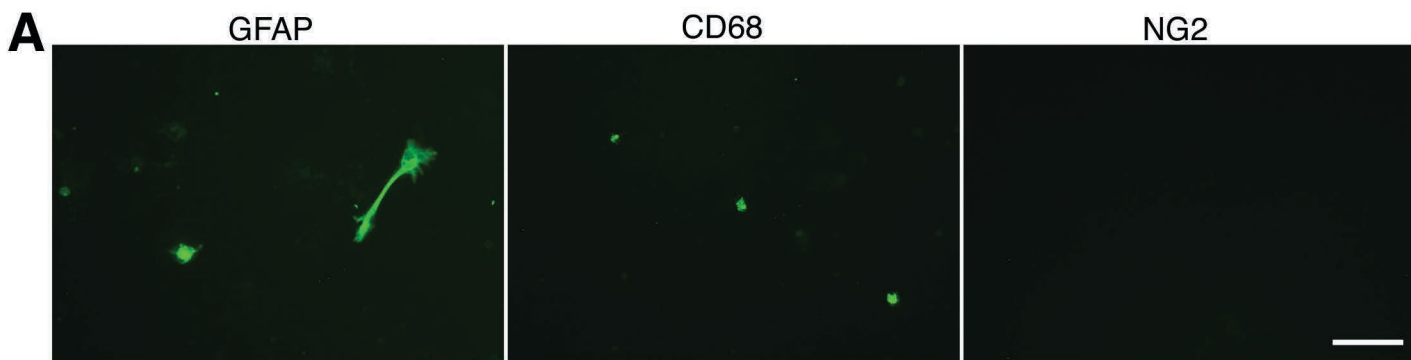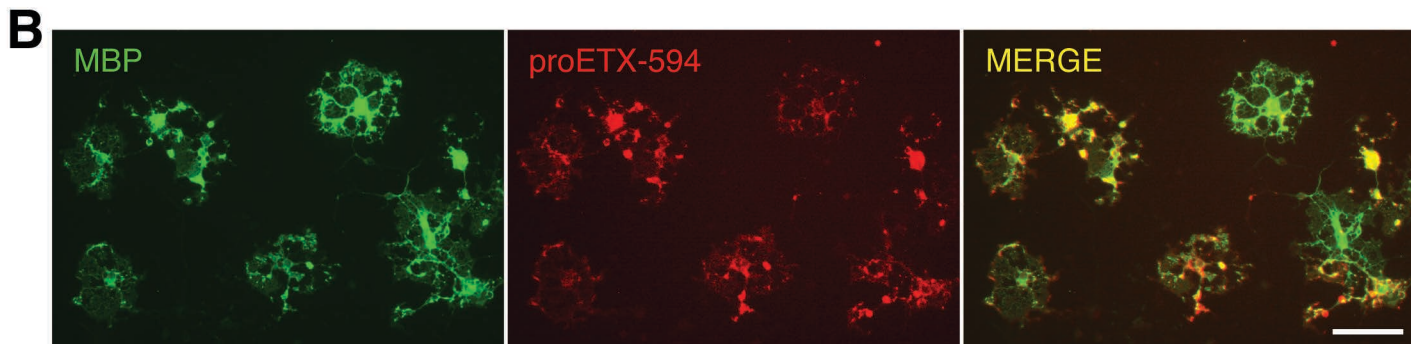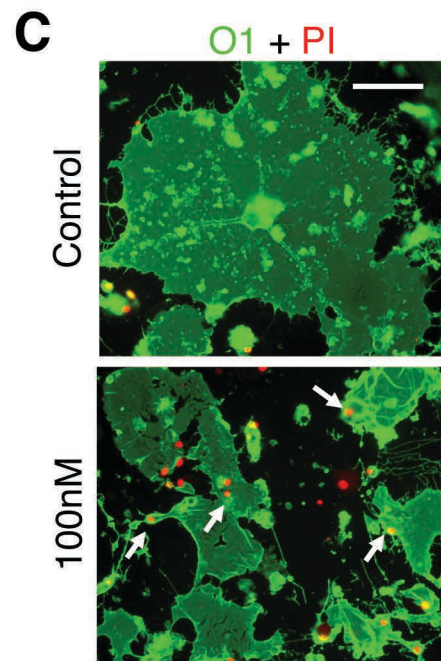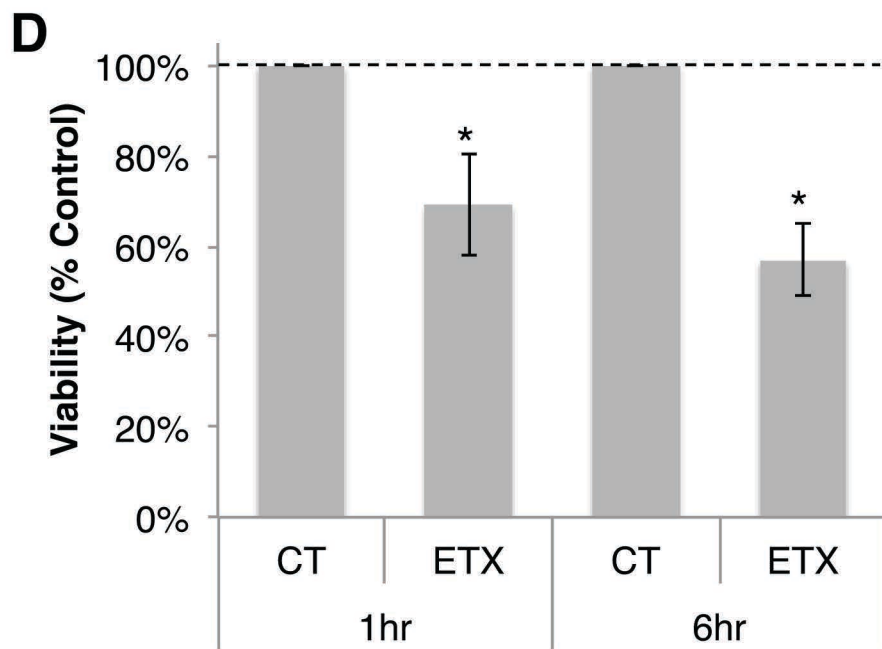

Supplement: mbo003152353sf1.pdf [file mbo003152353sf1.pdf]

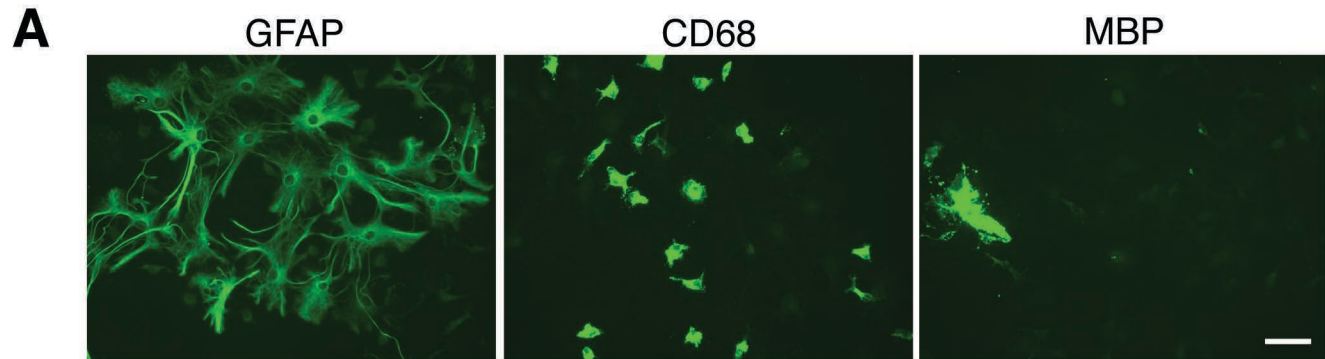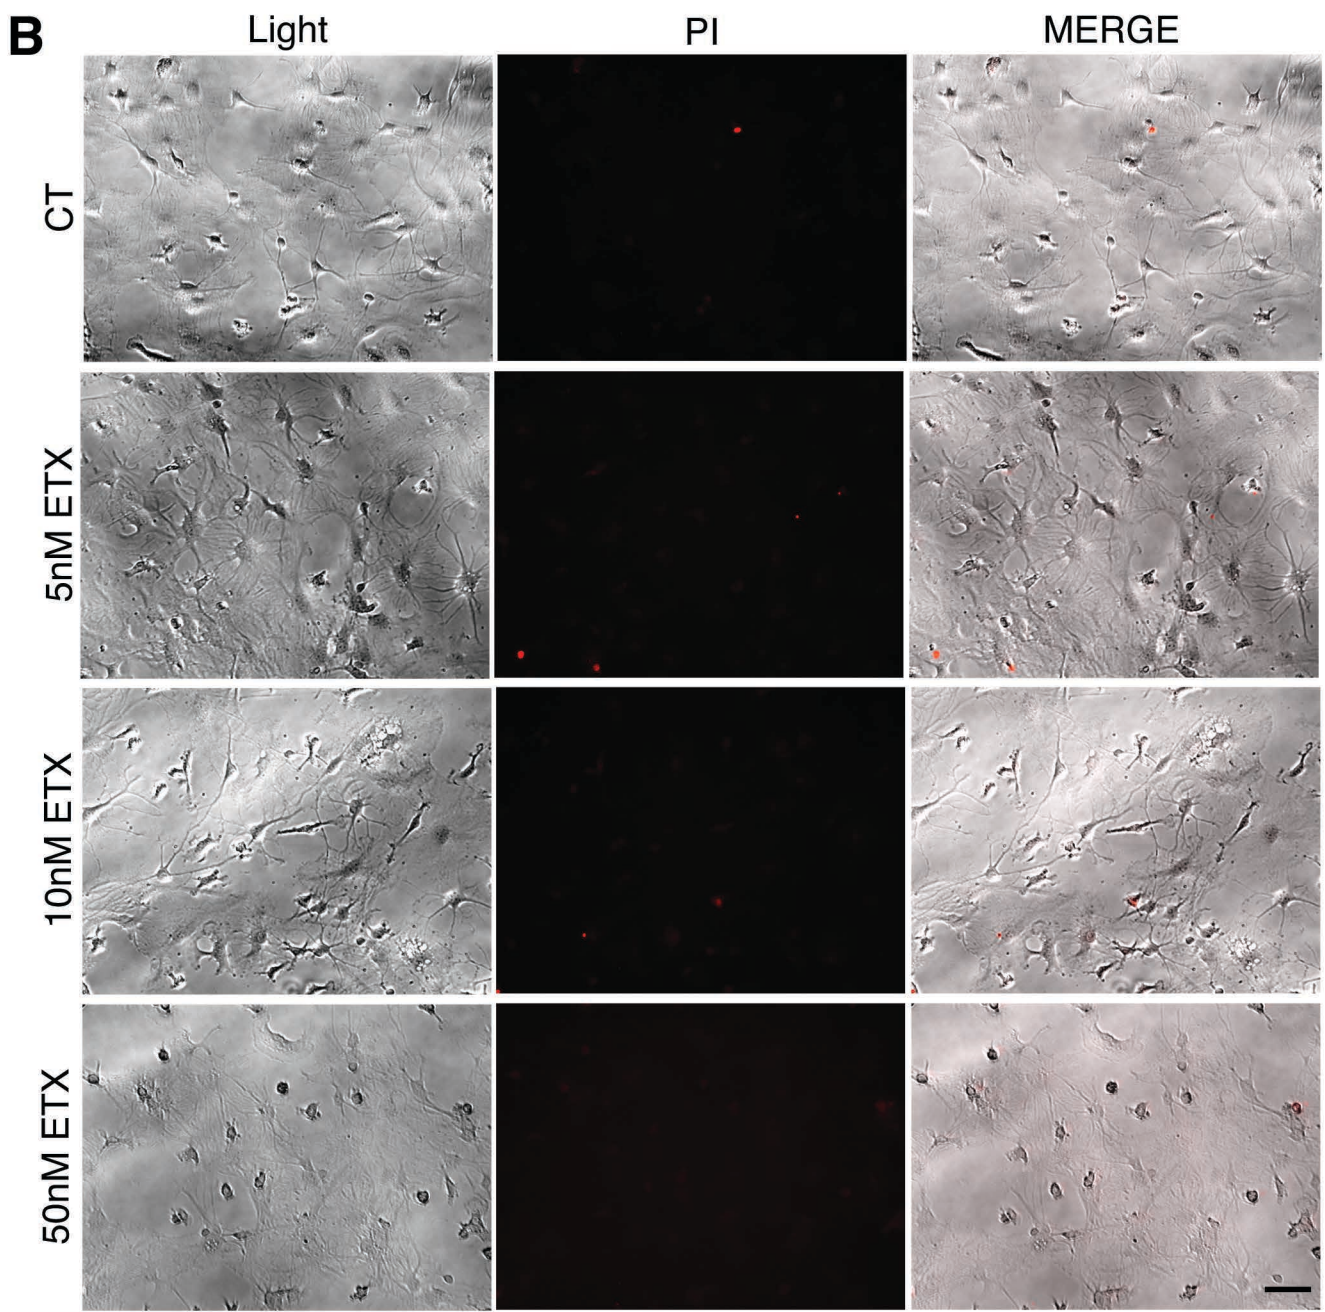

Supplement: mbo003152353sf2.pdf [file mbo003152353sf2.pdf]

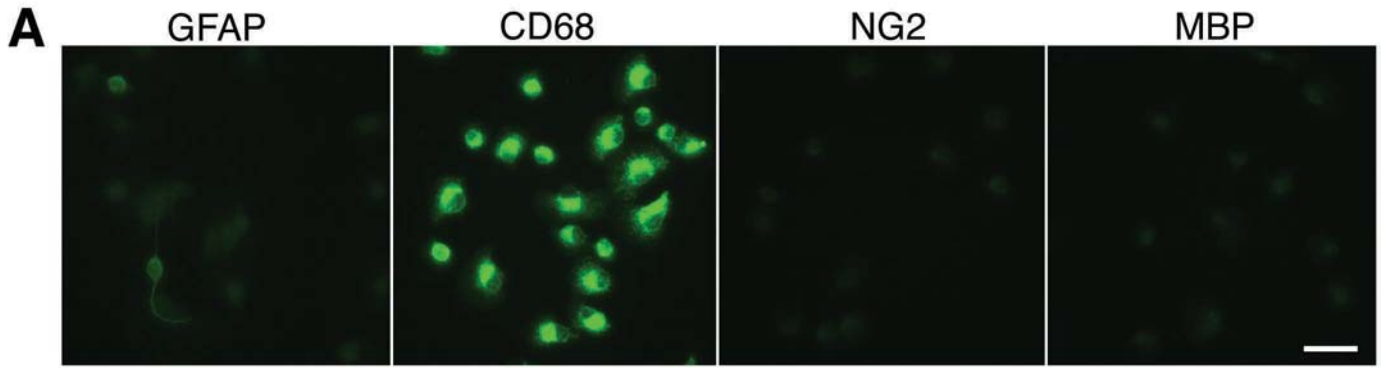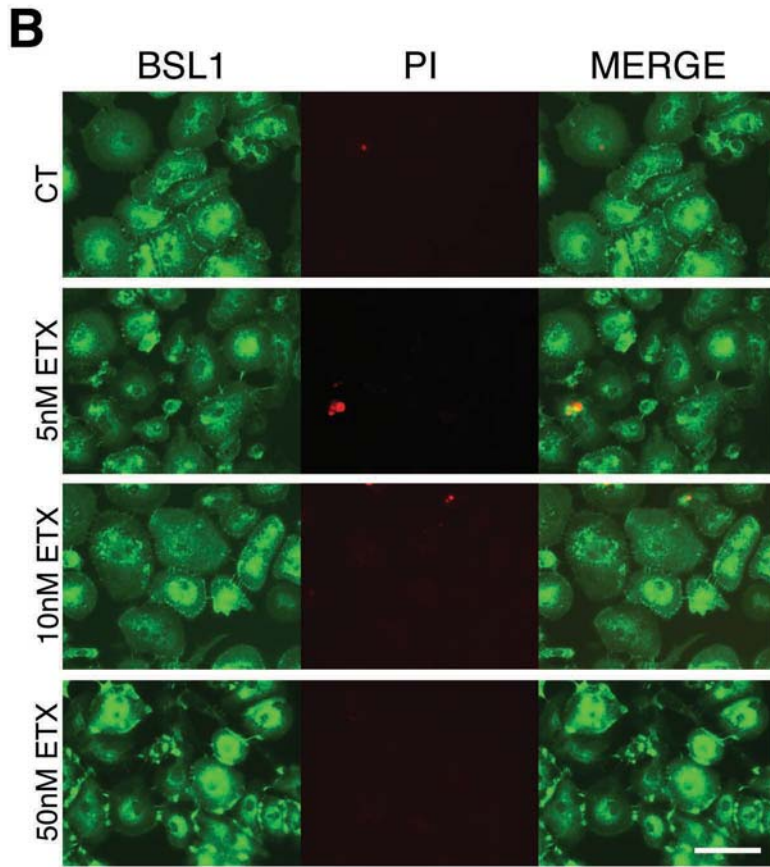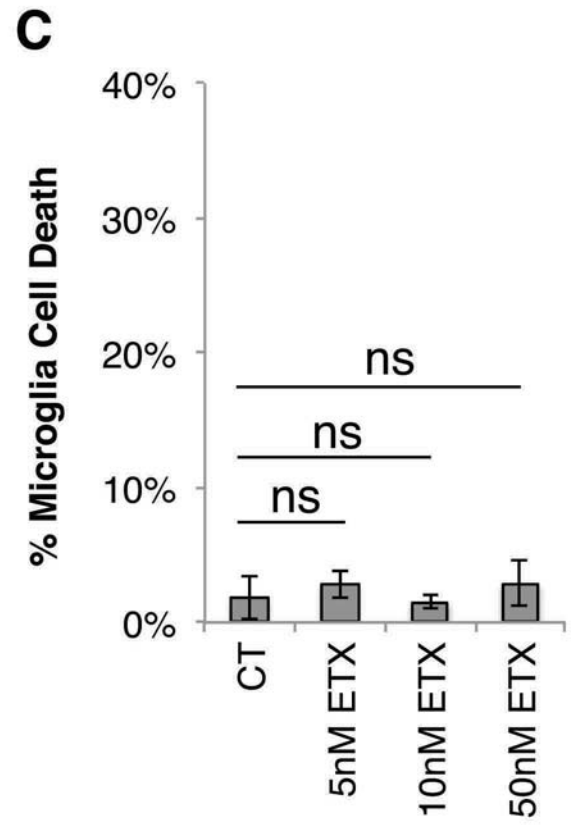

Supplement: mbo003152353sf3.pdf [file mbo003152353sf3.pdf]
